# Supplementary material
Source: publisher figshare collection journal article supplement (https://karger.figshare.com/ndownloader/files/20798094)
Supplement: Supplementary file 1 [file 20798094]

**Supplementary tables**

**Table S1:** **PC characteristics, aggregation response to arachidonic acid, and sterility**

| **Parameters** | **PPC (n=20)** | **APC (n=20)** | **Approved Specifications** |
| --- | --- | --- | --- |
| Number (pool size) | 20 (4–5 donations) | 20 (single donor) |  |
| Volume (ml) | 317 (310; 329) | 245 (238; 251) |  |
| Platelets per unit (x1011) Day 1 | 3.91 (3.4; 4.22) | 3.72 (3.03; 3.91) | >2x1011 |
| Platelet concentration (x109 /ml)  Day 2  Day 4  Day 7 | 1.14 (1.03; 1.31)  1.21 (1.00; 1.44)  1.12 (0.99; 1.22) | 1.51 (1.22; 1.67)  1.60 (1.42; 1.71)  1.59 (1.43; 1.87) | 1-2 |
| Residual red blood cells (x109) per unit ******** | 0.015  (0.011; 0.022) | 0.002  (0.001; 0.003) | <3 |
| Residual nucleated cells (x106) per unit ** | 0.38  (0.27; 0.65) | 0.52  (0.42; 0.61) | <1 |
| AA-induced aggregation Day 2  Non-responders,  Low responders, | 1/17  2/17 | 2/17  0/17 | n.a. |
| Sterility, Day 7 | 20/20 | 20/20 |  |

Approved specifications defined in the national guidelines [21] are given for reference, where applicable. Values are given as medians (with 1st and 3rd quartiles). ** p< 0.01; *** p< 0.001, significant differences between PPCs and APCs; AA, arachidonic acid; n.a., not applicable.

**Table S2:** **Thromboelastometry with PPCs and APCs**

| **Parameters** | **Day** | **PPC (n=10)** | **APC (n=10)** | **Plasma Reference (n=17)** |
| --- | --- | --- | --- | --- |
| | CT (sec) | | --- | |  | | Day 2  Day 4 | 1,192 (1,129; 1,361)  1,283 (1,171; 1,406) | 1,293 (935; 1,364)  1,090 (923; 1,236) | 1300 (1146; 1542) |
| | CFT (sec) | | --- | | Day 2  Day 4 | 399 (331; 555)  437 ( 396; 454) | 369 (314; 413)  355 (283; 371) | 881 (722; 991) |
| alpha (°)   |  | | --- | | Day 2  Day 4 | 35 (31; 42)  38 (36; 49) | 40 (37; 45)  43 (38; 48) | 19 (19; 23) |
| MCF (mm) | Day 2  Day 4 | 58 (57; 58)  60 (58; 62) | 59 (58; 62)  61 (59; 64) | 25 (24; 25) |

Platelet suspensions(3x108 /ml) and AB-plasma analyzed in a ROTEM™ analyzer after re-calcification (starTEM). Values are given as medians (with 1st and 3rd quartiles). n=10 PPCs, n=10 APCs, n=17 AB-plasma (internal reference); CT, coagulation time; CFT, clot formation time; MCF, maximum clot firmness.
